# Supplementary material for: Synthesis of a conformationally rigid scyllo-inositol polymer as a novel chelating ligandElectronic supplementary information (ESI) available: experimental procedures for preparation of compounds 3, 5, 6 and 20. See http://www.rsc.org/suppdata/p1/b1/b105105a/
Source: Royal Society of Chemistry journal article supplement (doi:10.1039/b105105a), 2001-09-27
Supplement: b105105a.doc [file b105105a.doc]

Supplementary data

Synthesis of a conformationally rigid *scyllo*-inositol polymer as a novel chelating ligand

Tae-Hyun Kima,b and Andrew B. Holmes*a,b

a University Chemical Laboratory, Department of Chemistry, University of Cambridge, Lensfield Road, Cambridge, CB2 1EW UK

bMelville Laboratory for Polymer Synthesis, Department of Chemistry, University of Cambridge, Pembroke Street, Cambridge, CB2 3RA UK; E-mail: abh1@cam.ac.uk

Experimental Procedures for the Preparation of Compounds (3), (5), (6) and (20)

**Preparation of 5-allyloxy-1,1,1-triethoxy-pentane (5)**

Dry HCl, generated from the reaction of ammonium chloride (8.31 g, 155 mmol) with concentrated sulfuric acid (7.3 cm3, 136 mmol), was bubbled through an ice-cooled solution of the nitrile **9** (14.4 g, 103 mmol) in absolute ethanol (6.6 cm3, 113 mmol) until most of the nitrile had been consumed. The resulting solution was allowed to stand at 0 C in the refrigerator for 5 days, after which time absolute ether (6 cm3) was added and left to stand at 0 C overnight. The volatiles were removed *in vacuo*, and the residue was azeotroped with benzene (5 cm3), to give the ethyl ester hydrochloride **10**. This was used for the next experiment without further purification. A solution of the iminoester hydrochloride **10** (18.6 g, 84.3 mmol) in absolute ethanol (72.1 cm3, 1.26 mol) (in a flask fitted with a reflux condenser and a thermometer dipping into the reaction mixture) was carefully protected against moisture and was stirred at r.t. for 10 mins. Anhydrous ether (206 cm3) was added and the resultant ethereal solution was refluxed at 40 C for 20 h. After this time the reaction mixture was cooled to 0 C and the precipitated ammonium chloride was filtered off under suction. The filtrate was washed with 10% aqueous Na2CO3 solution (250 cm3) and then with saturated aqueous Na2CO3 solution (30 cm3), dried over anhydrous K2CO3, filtered and the solvent was removed *in vacuo*. The resultant oil was distilled under pressure (0.1 mmHg) to give an inseparable mixture of the orthoester **5** and ethyl ester **11**. It was not possible to determine an accurate yield (or obtain full characterisation of orthoester **5**) because of purification problems. The 1H NMR analysis showed the presence of *ca*. 10:1 ratio of the desired product **5** (*ca*. 18.6 g, 65%) and the side product **11** (*ca*. 1.2 g, 7%); **H (250 MHz, CDCl3) data for **5**: 5.92-5.73 (1 H, m, C*H*=CH2), 5.18 (1 H, br dd, *J* 17.0 and 1.5, C*H*2=CH), 5.07 (1 H, br dd, *J* 10.5 and 1.5, C*H*2=CH), 3.87 (2 H, br dd, *J* 5.5 and 1.5, CH2=CHC*H*2), 3.47-3.33 (8 H, m, OC*H*2CH2 and 3 OC*H*2CH3), 1.71-1.25 (6 H, m, 3 C*H*2) and 1.10 (9 H, m, 3 OCH2C*H*3); data for **11**: 5.92-5.73 (0.1 H, m, 0.1 C*H*=CH2), 5.18 (0.1 H, br dd, *J* 17.0 and 1.5, 0.1 C*H*2=CH), 5.07 (0.1 H, br dd, *J* 10.5 and 1.5, 0.1 C*H*2=CH), 4.09 (0.2 H, q, *J* 7.0, 0.1 OC*H*2CH), 3.87 (0.2 H, br dd, *J* 5.5 and 1.5, 0.1 CH2=CHC*H*2), 3.47-3.33 (0.2 H, m, 0.1 OC*H*2CH2), 2.25 (0.2 H, t, *J* 7.0, 0.1 C*H*2CO), 1.71-1.25 (0.4 H, m, 0.1 C*H*2) and 1.10 (0.3 H, m, 0.1 OCH2C*H*3).

**Preparation of (1*R*,3*s*,5*S*,6*R*,7*s*,8*S*,9*s*)-3-(4-allyloxy-butyl)-2,4,10-trioxa-tricyclo[3.3.1.13,7]decane-6,8,9-triol (6)**

The orthoester **11** (7.51 g, 28.8 mmol) was added to a suspension of *myo*-inositol **4** (2.59 g, 14.4 mmol) and *p*-toluenesulfonic acid monohydrate (0.694 g, 3.66 mmol) in dry DMF (50 cm3) and the suspension was heated to 100 C for 21 h. The resulting pale yellow solution was cooled to r.t. and quenched by addition of a solution of NaHCO3 (0.5 g) in water (15 cm3). Removal of the solvent *in vacuo* gave a yellow gum, which was dissolved in a mixture of ethyl acetate (50 cm3) and water (30 cm3). The aqueous layer was separated and extracted with ethyl acetate. The combined organic layers were dried (Na2SO4), concentrated on the rotary evaporator and purified by flash column chromatography on silica and elution with CH2Cl2/EtOAc to give the inositol derivative **6** (3.03 g, 70%) as a colourless solid; m.p. 72-74 C (from EtOAc); R*f* 0.41 (EtOAc); (Found: C, 55.6; H, 7.2. C14H22O7 requires C, 55.6; H, 7.3%); **max (neat)/cm-1 3353 (O-H), 2948 (C-H), 2859 (C-H), 1420, 1312, 1257, 1072, 970 and 880; **H (400 MHz, CDCl3) 5.96-5.81 (1 H, dddd, *J* 17.0, 10.5, 5.5 and 5.5, C*H*=CH2), 5.27 (1 H, dddd, *J* 17.0, 1.5, 1.5 and 1.5, C*H*2=CH), 5.17 (1 H, dddd, *J* 10.5, 1.5, 1.5 and 1.5, C*H*2=CH), 4.63 (2 H, m, ring C-*H*), 4.37 (2 H, br s, ring C-*H*), 4.17 (3 H, br s, 2 ring C-*H* and O*H*), 4.09 (1 H, d, *J* 10.0, O*H*), 3.95 (2 H, ddd, *J* 5.5, 1.5 and 1.5, CH2=CHC*H*2), 3.53 (1 H, d, *J* 10.0, O*H*), 3.42 (2 H, t, *J* 5.5, OC*H*2CH2), 1.67 (2 H, t, *J* 7.0, C*H*2CCO3), 1.54 (4 H, m, 2 C*H*2); **c (62.5 MHz, CDCl3) 134.4 (CH, *C*H=CH2), 117.6 (CH2, CH=*C*H2), 109.0 (C, orthoester), 74.9 (CH, ring *C*), 71.9 (CH2, CH2=CH*C*H2), 70.3 (CH2, O*C*H2CH2), 68.5 (CH, ring *C*), 67.7 (CH, ring *C*), 59.8 (CH, ring *C*), 36.8 (CH2, *C*H2CCO3), 29.2 (*C*H2), 19.4 (*C*H2); *m/z* (ES) 303 [(M+H)+, 100%] and 118 (95%); [Found: (M+H)+ 303.1441. C14H23O7 requires *M*, 303.1444].

**General procedure for the polymerisation of monomer 19 to give 20**

The inositol methacrylate monomer **19** (123 mg, 0.18 mmol) and AIBN (2 mg, 1.6 wt%), were dissolved in distilled toluene (4 cm3­). The solution was freeze-thaw degassed using liquid nitrogen (4 cycles) and was allowed to warm to r.t. before the solution was heated at 65 C for 48 h. The solution was concentrated *in vacuo* to give an oil, which was dissolved in THF (1 cm3). The solution was added dropwise into a vigorously stirred mixture of methanol and ether (1:1; 10 cm3). The suspension was centrifuged (4.0 103 ppm) for 10 min and the supernatant was decanted. The precipitate was collected and dried to give the *polymer* **20** as a free flowing colourless powder (76 mg, 62%); ** max (KBr)/cm-1 2952 (C-H), 2866 (C-H), 1726 (C=O), 1614 (C=C), 1516, 1465 (aromatic C=C), 1253, 1089 and 986; **H (250 MHz, CDCl3) 7.2-6.8 (6 H, broad signal, 6 Ar*H*), 6.7-6.4 (6 H, broad signal, 6 Ar*H*), 4.7-4.3 (9 H, broad signal, 3 OC*H*2Ar and 3 ring C*H*), 4.3-4.1 (3 H, broad signal, 3 ring C*H*), 4.1-3.8 (2 H, broad signal, C*H*2OCO), 3.8-3.5 (9 H, broad signal, 3 OC*H*3), 2.1-0.8 (11 H, broad signal, 3 C*H*2 from inositol unit, and C*H*2 + C*H*3 from polymer backbone); GPC (CHCl3, RI)/Da *Mn* 5.6 103, *Mw* 7.7 103 and *Mw /Mn* 1.4; TGA (%/C) 97/290, 75/360, 50/380 and 0/550.

**Deprotection of polymer 20 to give 3**

A solution of the polymer **20** (60 mg, 0.086 mmol) and trifluoroacetic acid (0.06 cm3, 0.86 mmol) in CH2Cl2 (3 cm3) was stirred at r.t. for 1 h. The heterogeneous pink solution was filtered and the solid was washed with CH2Cl2 (5 2 cm3). The solid was collected and dried under vacuum for 24 h to give the *trihydroxy polymer* **3** as a free flowing colourless powder (25 mg, 89%); **max (KBr)/cm-1 3447 (O-H), 2955 (C-H), 1724 (C=O), 1458, 1388, 1259, 1069 and 982; **H (250 MHz, *d*6-DMSO) 5.2-5.1 (3 H, broad signal, O*H*), 4.3-4.1 (6 H, broad signal, ring C*H*), 3.8-3.6 (2 H, broad signal, C*H*2OCO), 1.6-0.7 (11 H, broad signal, 3 C*H*2, and C*H*2 and C*H*3 from polymer backbone); **C (500 MHz, *d*6-DMSO) selected data 108.1 (C, orthoester), 71.1 (CH, ring *C*), 66.5 (CH, ring *C*) and 19.3 (*C*H3); GPC (DMF, RI)/Da *Mn* 1.6 103, *Mw* 2.2 103 and *Mw /Mn* 1.4; TGA (%/C) 98/210, 75/315, 50/370 and 4/455.
